# Supplementary material for: Limited Cross-Species Virus Transmission in a Spatially Restricted Coral Reef Fish Community
Source: bioRxiv or medRxiv preprint supplement (doi:10.1101/2022.05.17.492384), 2022-05-18

# Narnaviridae

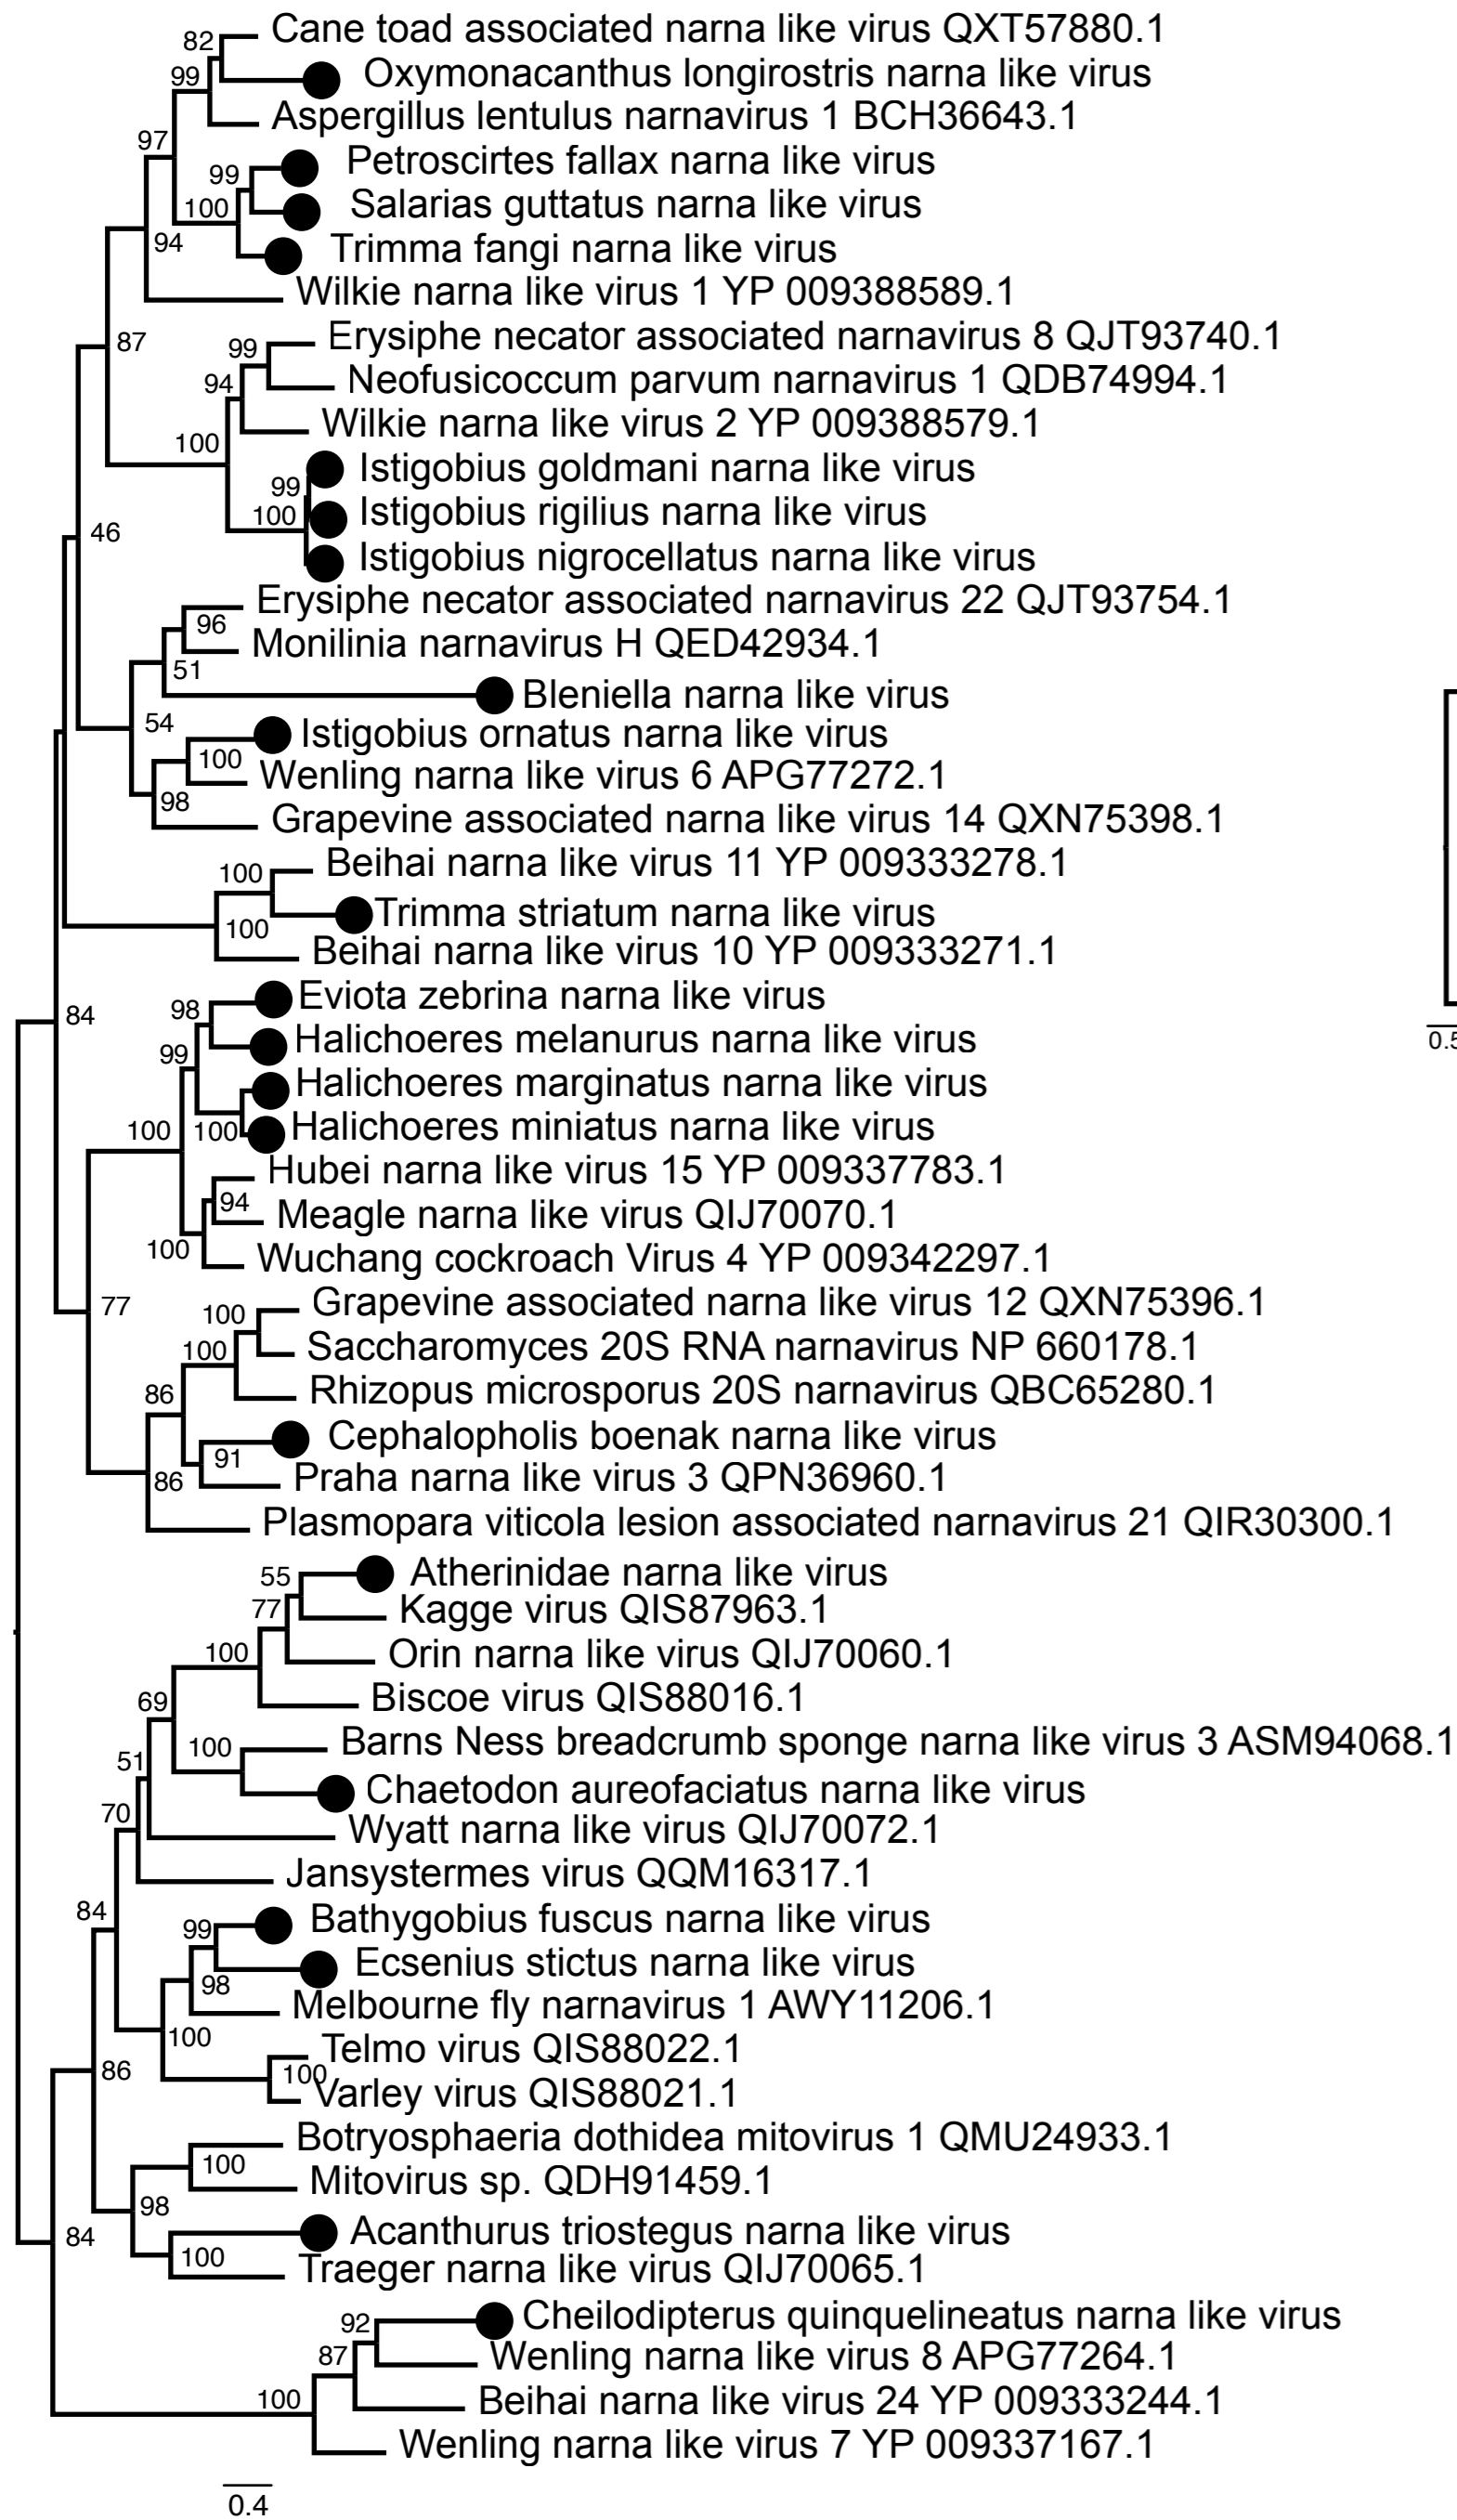

# Solemoviridae

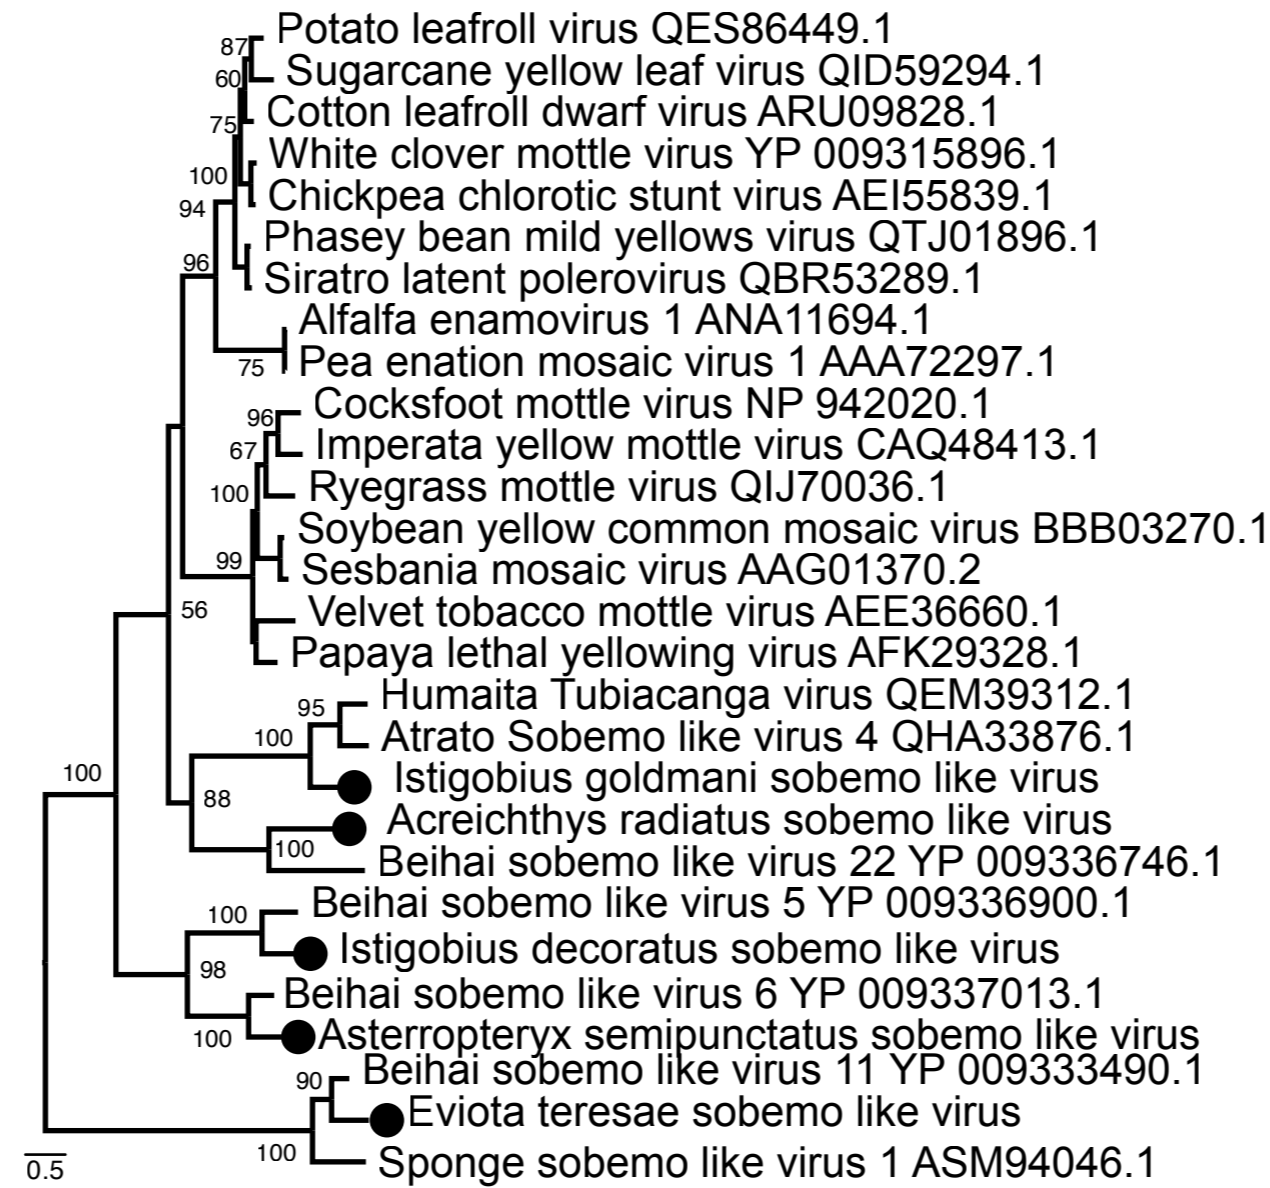

# Tombusviridae

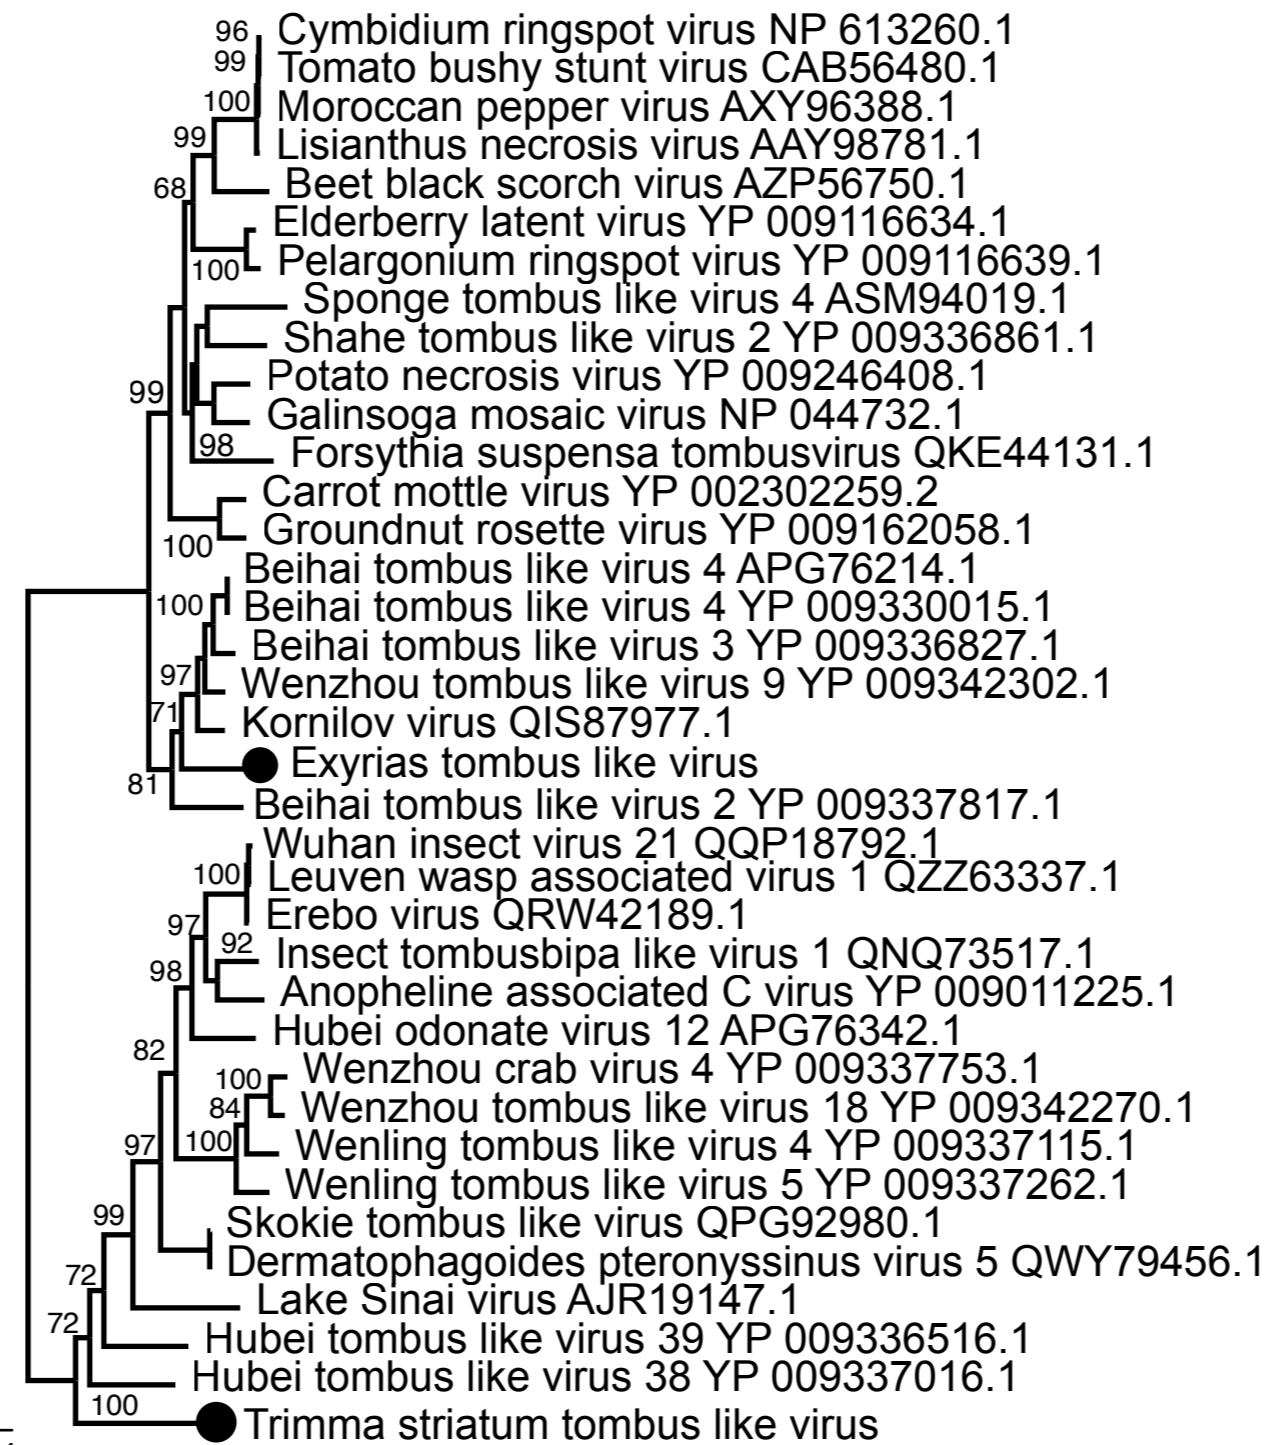

# Nodaviridae

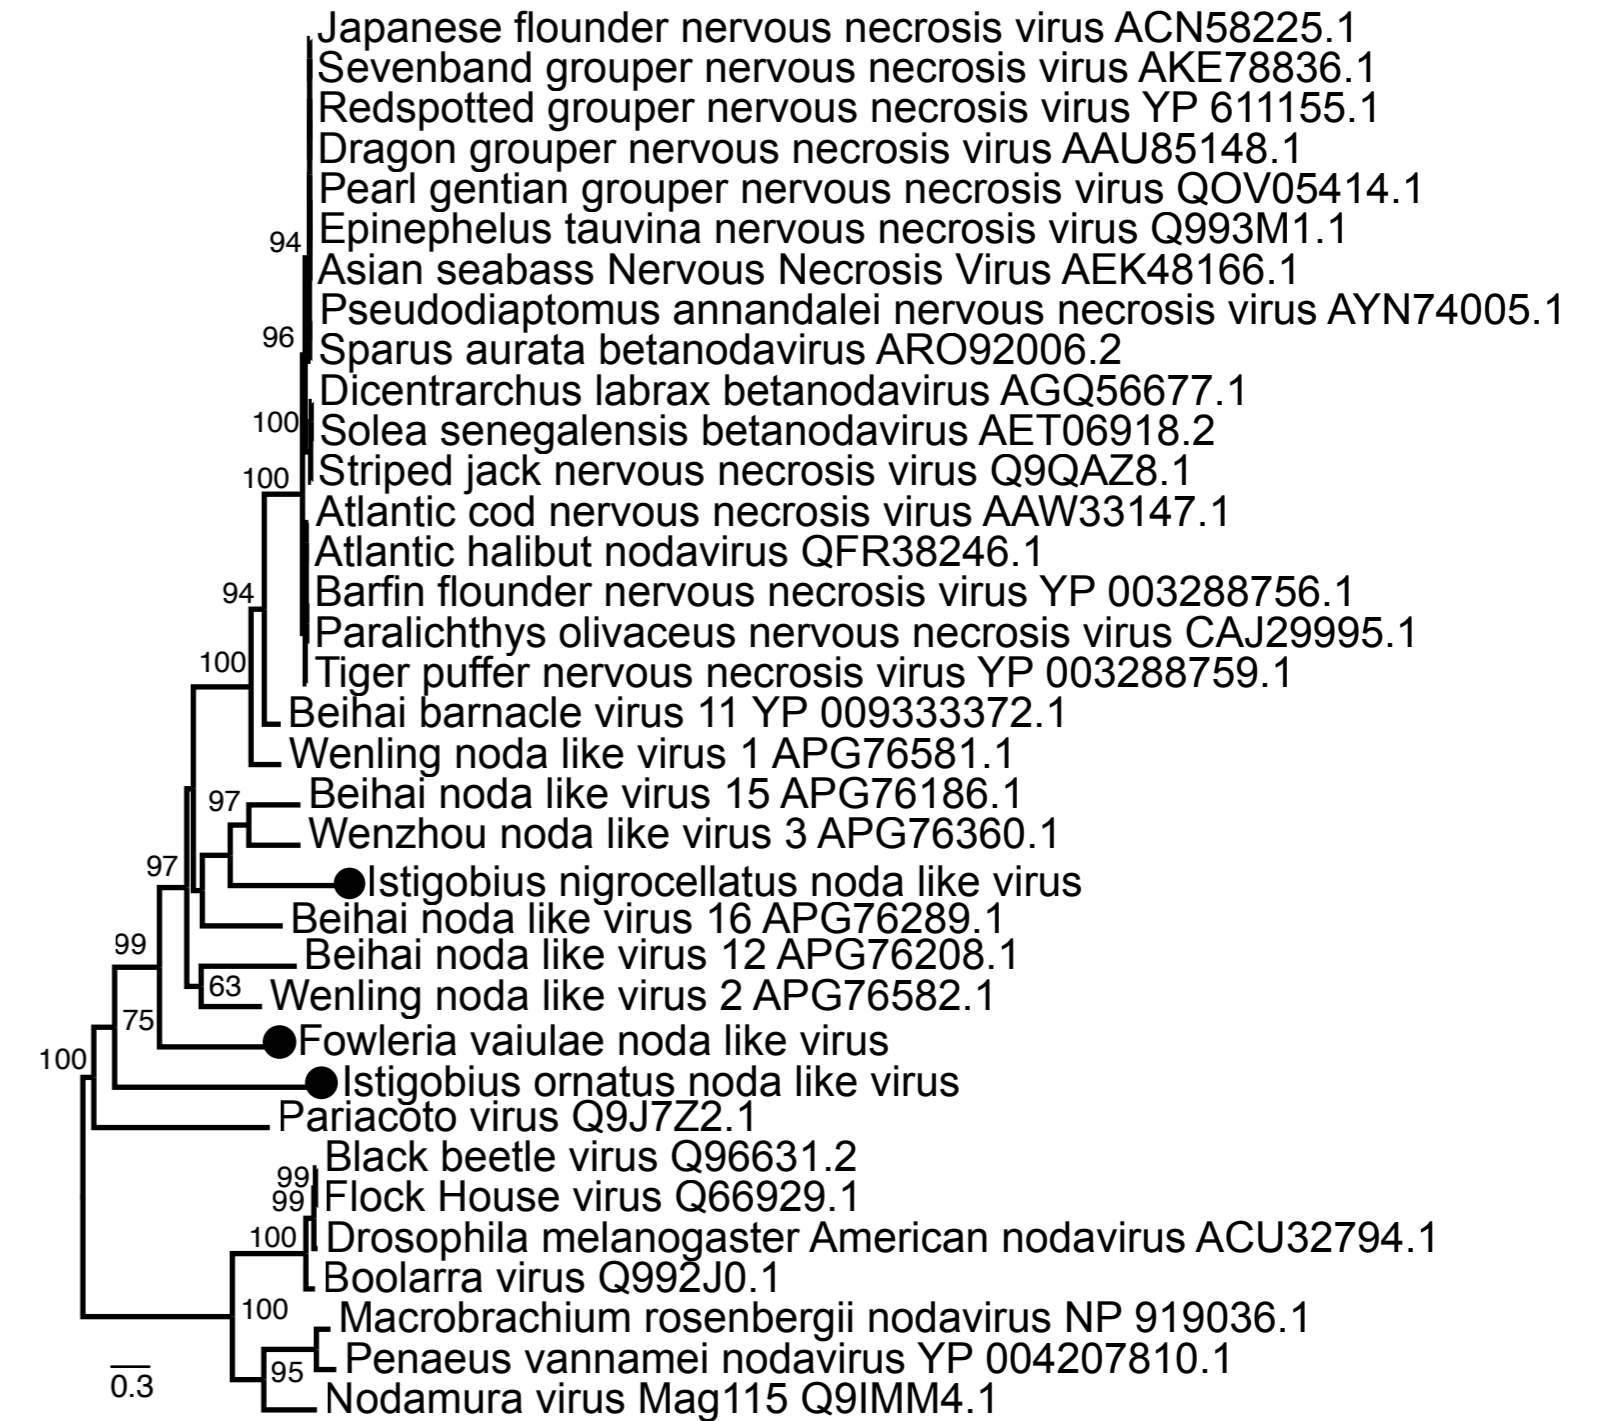

# Iflaviridae

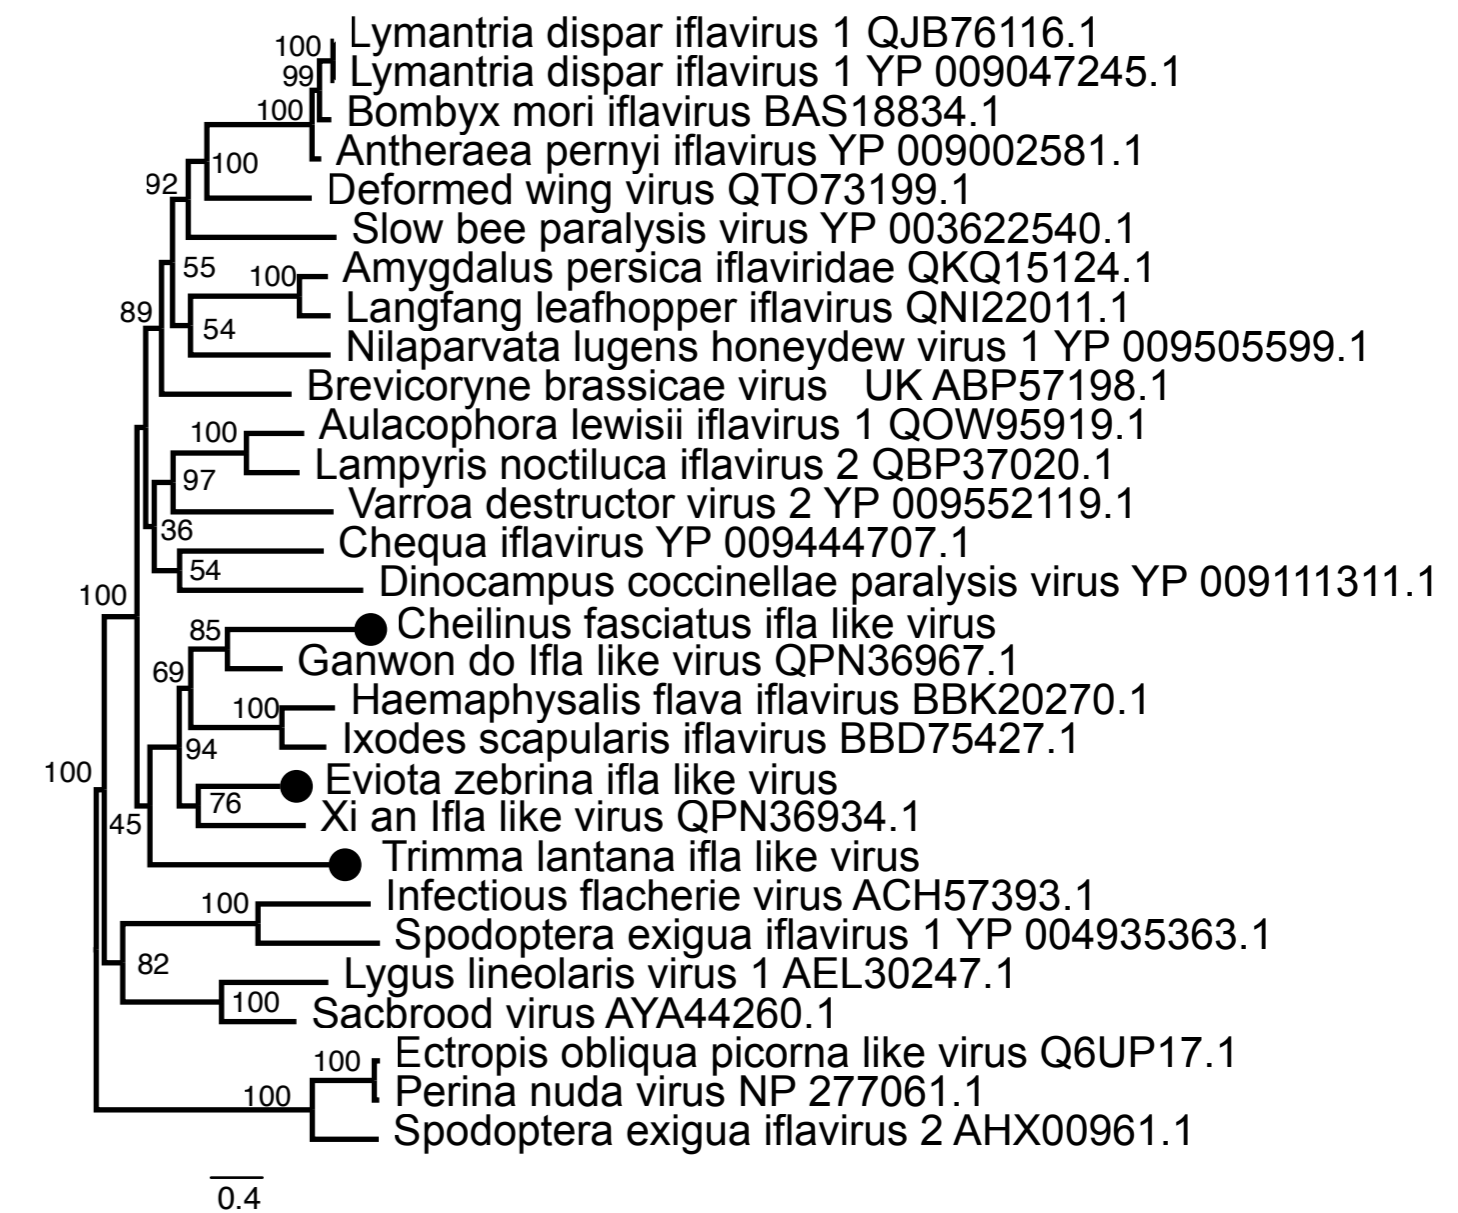

Supplement: Supplementary file [file media-4.pdf]
